# Supplementary material for: Biological Effects of Human Exposure to Environmental Cadmium
Source: MDPI journal article supplement (doi:10.3390/biom13010036), 2022-12-24
Supplement: s1 [file s1]

# Biological Effects of Human Exposure to Environmental Cadmium

Massimiliano Peana <sup>1,\*</sup>, Alessio Pelucelli <sup>1,\*</sup>, Christos T. Chasapis <sup>2</sup>, Spyros P. Perlepes <sup>3</sup>, Vlasoula Bekiari<sup>4</sup>, Serenella Medici <sup>1</sup>, and Maria Antonietta Zoroddu<sup>1</sup>

<sup>1</sup> Department of Chemical, Physical, Mathematical and Natural Sciences, University of Sassari, 07100 Sassari, Italy; peana@uniss.it (M.P.), alessiopelucelli@gmail.com (A.P.), sere@uniss.it (S.M.), zoroddu@uniss.it (M.A.Z.)

<sup>2</sup> Institute of Chemical Biology, National Hellenic Research Foundation, 11635 Athens, Greece; cchasapis@eie.gr

<sup>3</sup> Department of Chemistry, University of Patras, 26500 Patras, Greece; perlepes@upatras.gr

<sup>4</sup> School of Agricultural Science, University of Patras, 30200 Messolonghi, Greece; bbekiari@upatras.gr

\* Correspondence: peana@uniss.it (M.P.), alessiopelucelli@gmail.com (A.P.)

## Supplementary Material

**Table S1.** Percentage distribution of geometries for Cd<sup>2+</sup> complexed with proteins according to RCSB PDB database

| Geometry                                         | N° entry | %     |
|--------------------------------------------------|----------|-------|
| octahedron                                       | 60       | 12,7% |
| square pyramid with a vacancy (equatorial)       | 68       | 14,3% |
| square pyramid                                   | 31       | 6,5%  |
| square plane                                     | 15       | 3,2%  |
| square plane with a vacancy (regular)            | 30       | 6,3%  |
| tetrahedron with vacancy                         | 51       | 10,8% |
| tetrahedron                                      | 24       | 5,1%  |
| trigonal plane with a vacancy                    | 85       | 17,9% |
| trigonal bipyramid with a vacancy (axial)        | 21       | 4,4%  |
| trigonal bipyramid with a vacancy (equatorial)   | 17       | 3,6%  |
| trigonal bipyramid                               | 4        | 0,8%  |
| pentagonal bipyramid with a vacancy (equatorial) | 33       | 7,0%  |
| pentagonal bipyramid                             | 16       | 3,4%  |
| others                                           | 19       | 4,0%  |

**Table S2.** Percentage distribution of metal ions substituted by Cd<sup>2+</sup> according to the RCSB PDB database

| Metals | % of Cd substitution<br>in Metal-protein | n° of Cd substitution<br>in Metal-protein | % of Cd substitution<br>in Metal-proteins |
|--------|------------------------------------------|-------------------------------------------|-------------------------------------------|
| Zn     | 4,1%                                     | 1245                                      | 29,7%                                     |
| Mg     | 2,1%                                     | 623                                       | 14,0%                                     |
| Ca     | 2,2%                                     | 590                                       | 14,1%                                     |
| Co     | 1,6%                                     | 417                                       | 10,0%                                     |
| Mn     | 1,1%                                     | 368                                       | 8,8%                                      |
| Fe     | 3,2%                                     | 309                                       | 7,4%                                      |
| Na     | 1,1%                                     | 286                                       | 6,8%                                      |
| Cu     | 1,6%                                     | 167                                       | 4,0%                                      |
| Ni     | 0,9%                                     | 134                                       | 3,2%                                      |
| K      | 0,5%                                     | 50                                        | 1,2%                                      |

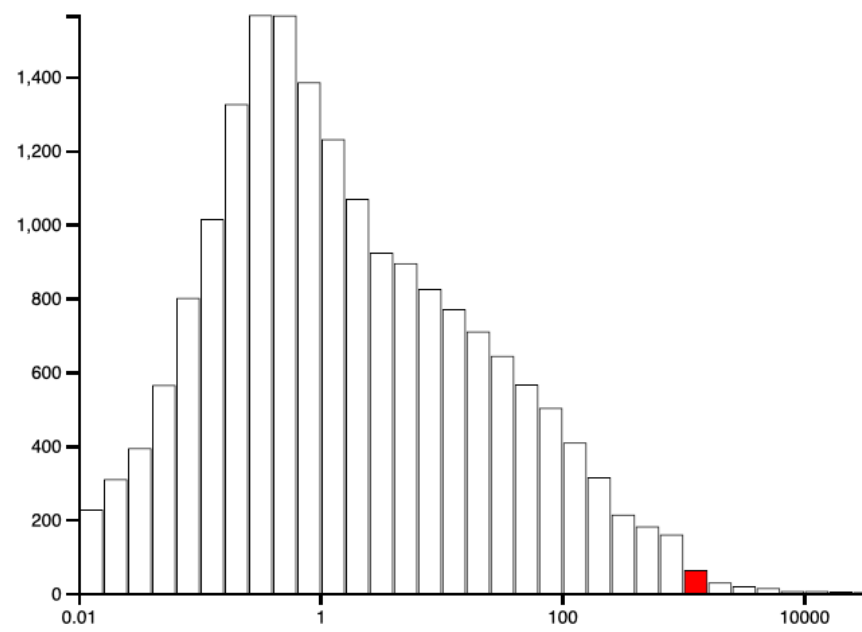

**Figure S1.** Protein abundance histogram of human proteins. In red the abundance of Heat Shock protein HSP 90-beta.
